# Supplementary material for: Separating conditional and unconditional cooperation in a sequential Prisoner’s Dilemma game
Source: PLoS One. 2017 Nov 9;12(11):e0187952. doi: 10.1371/journal.pone.0187952 (PMC5679624; doi:10.1371/journal.pone.0187952)
Supplement: S1 Raw Data — (XLSX) [file pone.0187952.s001.xlsx]

## Sheet: Experiment 1
Age	Gender	C12_1SmiCooYes	C12_2SmiCooNo	C12_3SmiCheYes	C12_4SmiCheNo	C12_5SmiNewYes	C12_6SmiNewNo	C12_7AngCooYes	C12_8AngCooNo	C12_9AngCheYes	C12_10AngCheNo	C12_11AngNewYes	C12_12AngNewNo
20	M	5	7	4	8	1	11	7	5	9	3	11	1
23	F	9	3	8	4	3	9	3	9	5	7	5	7
19	F	5	7	2	10	3	9	2	10	1	11	1	11
32	F	8	4	5	7	6	6	2	10	4	8	4	8
18	F	6	6	7	5	7	5	7	5	1	11	8	4
26	M	9	3	4	8	0	12	10	2	5	7	1	11
26	F	9	3	8	4	10	2	4	8	4	8	2	10
29	M	10	2	7	5	9	3	6	6	2	10	3	9
35	M	11	1	2	10	12	0	11	1	1	11	12	0
25	F	10	2	7	5	10	2	7	5	5	7	8	4
22	F	11	1	6	6	5	7	7	5	2	10	5	7
22	F	10	2	5	7	7	5	8	4	2	10	5	7
21	F	10	2	2	10	9	3	9	3	3	9	7	5
18	F	10	2	9	3	7	5	6	6	3	9	4	8
20	M	10	2	7	5	12	0	11	1	3	9	11	1
24	M	7	5	5	7	9	3	6	6	2	10	6	6
38	M	6	6	7	5	6	6	7	5	7	5	9	3
19	F	5	7	2	10	6	6	10	2	7	5	6	6
15	M	0	12	0	12	0	12	0	12	0	12	0	12
20	F	4	8	8	4	3	9	2	10	3	9	0	12
19	F	8	4	4	8	7	5	6	6	4	8	3	9
28	M	9	3	3	9	5	7	9	3	4	8	5	7
20	F	5	7	6	6	9	3	6	6	7	5	11	1
21	M	2	10	0	12	0	12	6	6	2	10	0	12
21	F	9	3	6	6	7	5	8	4	6	6	2	10
24	M	9	3	6	6	6	6	5	7	7	5	5	7
19	M	7	5	4	8	6	6	6	6	7	5	4	8
19	M	5	7	7	5	8	4	8	4	2	10	4	8
26	M	10	2	4	8	12	0	12	0	5	7	11	1
22	F	6	6	5	7	6	6	11	1	6	6	7	5
19	M	5	7	2	10	1	11	2	10	3	9	1	11
20	M	0	12	0	12	0	12	0	12	0	12	0	12
22	F	10	2	4	8	10	2	12	0	7	5	12	0
24	F	11	1	9	3	9	3	3	9	0	12	2	10
22	F	6	6	5	7	0	12	7	5	2	10	0	12
23	F	6	6	2	10	4	8	2	10	0	12	2	10
23	M	11	1	8	4	9	3	7	5	7	5	8	4
24	M	9	3	8	4	8	4	9	3	3	9	6	6
27	M	6	6	3	9	10	2	12	0	3	9	9	3
19	F	7	5	2	10	0	12	5	7	2	10	2	10
19	F	6	6	8	4	7	5	8	4	5	7	3	9
28	F	10	2	6	6	7	5	9	3	6	6	6	6
19	M	3	9	2	10	3	9	4	8	5	7	5	7
19	F	3	9	7	5	1	11	8	4	2	10	1	11
24	F	10	2	3	9	10	2	9	3	1	11	9	3
21	F	12	0	1	11	2	10	9	3	0	12	0	12
27	F	8	4	4	8	6	6	7	5	2	10	5	7
20	F	12	0	11	1	11	1	11	1	9	3	12	0
21	F	11	1	5	7	6	6	2	10	3	9	4	8
29	F	7	5	1	11	0	12	6	6	2	10	0	12
21	F	5	7	3	9	2	10	4	8	4	8	5	7
19	F	11	1	8	4	11	1	9	3	1	11	2	10
29	F	12	0	5	7	8	4	6	6	3	9	1	11
29	F	10	2	0	12	0	12	6	6	0	12	0	12
23	F	4	8	1	11	4	8	8	4	4	8	3	9
25	F	9	3	7	5	9	3	8	4	5	7	10	2
24	F	8	4	0	12	4	8	8	4	1	11	5	7
20	F	4	8	4	8	5	7	5	7	6	6	8	4
22	F	7	5	1	11	3	9	4	8	1	11	5	7
22	F	9	3	7	5	9	3	8	4	2	10	5	7
20	M	11	1	4	8	1	11	10	2	1	11	0	12
22	M	8	4	3	9	4	8	5	7	2	10	4	8
24	F	8	4	1	11	4	8	11	1	1	11	2	10
27	F	12	0	0	12	12	0	11	1	0	12	11	1
25	F	2	10	4	8	3	9	10	2	7	5	9	3
21	F	5	7	7	5	5	7	9	3	3	9	7	5
23	M	8	4	6	6	7	5	12	0	5	7	9	3
20	F	10	2	6	6	11	1	5	7	3	9	3	9
22	F	9	3	4	8	1	11	8	4	1	11	1	11
19	M	7	5	3	9	4	8	8	4	3	9	4	8
20	M	8	4	7	5	7	5	8	4	6	6	7	5
24	F	8	4	3	9	0	12	9	3	1	11	2	10
21	F	4	8	6	6	7	5	3	9	5	7	3	9
21	F	10	2	11	1	7	5	5	7	6	6	4	8
31	M	7	5	5	7	8	4	7	5	2	10	7	5
19	F	4	8	1	11	3	9	8	4	2	10	1	11
22	M	5	7	6	6	4	8	6	6	3	9	2	10
34	F	8	4	7	5	8	4	6	6	6	6	6	6
20	F	9	3	9	3	9	3	8	4	9	3	10	2
33	M	12	0	12	0	12	0	12	0	12	0	12	0
22	F	9	3	2	10	11	1	10	2	3	9	3	9
23	M	8	4	6	6	4	8	7	5	5	7	4	8
20	F	9	3	8	4	7	5	5	7	4	8	5	7
22	M	9	3	10	2	6	6	7	5	5	7	6	6
29	M	12	0	4	8	1	11	10	2	1	11	0	12
24	M	8	4	7	5	9	3	6	6	4	8	3	9
39	F	5	7	3	9	9	3	2	10	3	9	3	9
31	M	11	1	1	11	10	2	8	4	1	11	6	6
20	F	10	2	7	5	4	8	10	2	2	10	3	9
22	M	0	12	1	11	1	11	0	12	1	11	1	11
20	F	11	1	3	9	6	6	8	4	2	10	3	9
18	M	9	3	5	7	5	7	8	4	5	7	5	7
28	M	1	11	0	12	2	10	6	6	4	8	5	7
23	F	12	0	12	0	12	0	12	0	12	0	12	0
19	F	9	3	2	10	4	8	5	7	1	11	2	10
22	F	12	0	12	0	12	0	12	0	12	0	12	0
20	F	7	5	6	6	4	8	10	2	5	7	3	9
19	M	9	3	2	10	8	4	10	2	1	11	7	5
21	F	5	7	6	6	4	8	3	9	0	12	2	10
19	M	11	1	9	3	11	1	3	9	4	8	6	6
21	F	11	1	9	3	7	5	1	11	2	10	2	10
21	F	9	3	6	6	8	4	7	5	4	8	6	6
26	M	7	5	0	12	1	11	4	8	2	10	0	12
25	F	11	1	10	2	10	2	8	4	7	5	7	5
20	M	8	4	4	8	3	9	6	6	1	11	1	11
20	F	11	1	7	5	10	2	10	2	5	7	8	4
21	F	6	6	5	7	10	2	6	6	4	8	2	10
23	F	12	0	2	10	9	3	12	0	3	9	0	12
20	F	6	6	8	4	6	6	9	3	5	7	3	9
19	M	9	3	9	3	11	1	8	4	8	4	9	3
20	F	5	7	0	12	1	11	6	6	0	12	4	8
23	F	10	2	9	3	11	1	0	12	2	10	4	8
23	F	9	3	6	6	12	0	8	4	3	9	10	2
22	F	9	3	2	10	7	5	4	8	3	9	1	11
21	F	3	9	4	8	6	6	9	3	3	9	3	9
19	F	8	4	4	8	5	7	3	9	1	11	2	10
19	F	6	6	8	4	9	3	2	10	1	11	4	8
30	M	12	0	4	8	8	4	8	4	2	10	2	10
28	M	5	7	5	7	3	9	10	2	9	3	9	3
25	M	8	4	4	8	6	6	6	6	3	9	6	6
		944	496	594	846	740	700	830	610	429	1011	569	871

## Sheet: Experiment 2
Age	Gender	C12_1SmiCooYes	C12_2SmiCooNo	C12_3SmiCheYes	C12_4SmiCheNo	C12_5SmiNewYes	C12_6SmiNewNo	C12_7AngCooYes	C12_8AngCooNo	C12_9AngCheYes	C12_10AngCheNo	C12_11AngNewYes	C12_12AngNewNo
18	F	8	4	2	10	7	5	2	10	0	12	0	12
22	M	5	7	4	8	9	3	3	9	0	12	0	12
19	M	12	0	12	0	12	0	12	0	12	0	12	0
28	F	10	2	5	7	9	3	8	4	4	8	9	3
21	M	7	5	7	5	2	10	6	6	4	8	1	11
24	F	2	10	1	11	1	11	0	12	0	12	0	12
32	F	7	5	3	9	7	5	2	10	2	10	3	9
21	M	1	11	4	8	1	11	5	7	1	11	2	10
28	M	12	0	12	0	12	0	12	0	12	0	12	0
32	M	6	6	2	10	6	6	6	6	2	10	4	8
35	M	11	1	0	12	0	12	12	0	0	12	0	12
19	F	8	4	8	4	8	4	2	10	2	10	4	8
30	F	8	4	3	9	4	8	8	4	2	10	5	7
24	M	8	4	5	7	8	4	4	8	2	10	2	10
24	F	0	12	0	12	0	12	0	12	0	12	0	12
24	M	7	5	11	1	8	4	1	11	0	12	0	12
28	F	8	4	4	8	6	6	3	9	0	12	0	12
31	M	4	8	2	10	3	9	6	6	1	11	1	11
21	F	9	3	12	0	11	1	4	8	3	9	3	9
32	M	5	7	2	10	3	9	4	8	1	11	2	10
25	M	5	7	4	8	10	2	3	9	4	8	3	9
25	M	5	7	3	9	4	8	5	7	1	11	3	9
24	M	12	0	12	0	12	0	12	0	12	0	12	0
18	F	10	2	10	2	11	1	7	5	3	9	4	8
19	F	6	6	9	3	8	4	0	12	2	10	0	12
19	F	7	5	4	8	8	4	3	9	3	9	2	10
19	F	0	12	0	12	2	10	7	5	5	7	5	7
25	M	4	8	6	6	4	8	4	8	2	10	2	10
23	F	9	3	5	7	3	9	4	8	1	11	4	8
19	F	3	9	4	8	7	5	9	3	8	4	6	6
20	M	3	9	2	10	0	12	8	4	0	12	0	12
31	M	7	5	4	8	9	3	9	3	2	10	5	7
32	M	9	3	1	11	0	12	8	4	2	10	0	12
31	M	7	5	2	10	0	12	9	3	1	11	3	9
21	F	5	7	0	12	5	7	6	6	6	6	8	4
18	F	6	6	6	6	9	3	7	5	1	11	3	9
22	M	7	5	3	9	2	10	3	9	0	12	4	8
29	M	12	0	12	0	12	0	12	0	12	0	12	0
19	M	6	6	4	8	3	9	7	5	8	4	6	6
27	M	7	5	6	6	11	1	4	8	6	6	6	6
25	M	9	3	4	8	3	9	5	7	1	11	1	11
22	F	5	7	2	10	7	5	9	3	6	6	9	3
25	F	9	3	0	12	0	12	10	2	0	12	0	12
24	M	8	4	2	10	7	5	7	5	2	10	1	11
38	M	7	5	0	12	4	8	9	3	8	4	6	6
25	F	6	6	7	5	3	9	3	9	2	10	1	11
19	F	1	11	3	9	0	12	0	12	0	12	0	12
21	F	4	8	3	9	5	7	2	10	0	12	0	12
18	F	1	11	3	9	1	11	6	6	6	6	6	6
24	F	7	5	5	7	9	3	5	7	3	9	7	5
24	F	10	2	7	5	8	4	4	8	3	9	1	11
22	F	8	4	5	7	8	4	8	4	6	6	5	7
26	M	0	12	0	12	0	12	0	12	0	12	0	12
25	F	3	9	4	8	4	8	2	10	2	10	0	12
20	M	0	12	0	12	0	12	0	12	0	12	0	12
20	M	11	1	9	3	9	3	6	6	4	8	6	6
21	F	12	0	4	8	10	2	7	5	3	9	3	9
22	F	4	8	2	10	6	6	7	5	4	8	7	5
22	F	9	3	8	4	9	3	6	6	6	6	6	6
25	F	9	3	8	4	10	2	4	8	3	9	2	10
20	M	8	4	2	10	5	7	6	6	5	7	7	5
23	M	0	12	0	12	0	12	0	12	0	12	0	12
19	F	6	6	8	4	7	5	7	5	8	4	9	3
28	F	7	5	5	7	9	3	4	8	2	10	4	8
25	M	10	2	3	9	11	1	8	4	3	9	5	7
28	M	0	12	0	12	0	12	0	12	0	12	0	12
29	M	1	11	1	11	1	11	2	10	2	10	1	11
35	F	9	3	2	10	5	7	7	5	1	11	1	11
24	M	5	7	3	9	7	5	9	3	6	6	5	7
22	M	0	12	2	10	4	8	1	11	2	10	2	10
19	F	7	5	4	8	3	9	1	11	1	11	2	10
21	F	9	3	3	9	5	7	6	6	5	7	3	9
28	M	9	3	1	11	7	5	6	6	1	11	5	7
29	F	7	5	1	11	3	9	2	10	1	11	1	11
32	F	4	8	4	8	5	7	0	12	2	10	2	10
27	F	11	1	2	10	0	12	10	2	0	12	0	12
18	M	9	3	8	4	7	5	5	7	2	10	2	10
20	F	2	10	4	8	6	6	0	12	2	10	0	12
21	F	6	6	7	5	5	7	10	2	4	8	5	7
22	M	4	8	3	9	2	10	3	9	5	7	0	12
22	F	7	5	4	8	4	8	8	4	0	12	0	12
20	F	6	6	3	9	3	9	3	9	0	12	0	12
21	F	0	12	2	10	1	11	0	12	0	12	0	12
22	M	4	8	3	9	6	6	8	4	4	8	5	7
31	M	8	4	0	12	0	12	10	2	1	11	0	12
18	F	5	7	3	9	4	8	5	7	3	9	6	6
28	M	0	12	0	12	0	12	0	12	0	12	0	12
24	F	9	3	6	6	9	3	4	8	8	4	8	4
24	F	4	8	6	6	9	3	7	5	7	5	3	9
39	M	6	6	3	9	6	6	8	4	2	10	1	11
28	M	8	4	0	12	9	3	11	1	3	9	8	4
48	F	10	2	3	9	3	9	6	6	0	12	0	12
22	M	1	11	2	10	1	11	0	12	1	11	1	11
27	M	6	6	8	4	9	3	9	3	2	10	3	9
21	F	9	3	6	6	6	6	7	5	5	7	6	6
28	F	5	7	5	7	5	7	5	7	3	9	3	9
20	M	10	2	10	2	7	5	0	12	0	12	0	12
24	F	8	4	6	6	6	6	1	11	1	11	0	12
21	F	10	2	4	8	10	2	0	12	0	12	0	12
21	F	9	3	5	7	8	4	3	9	0	12	3	9
22	F	10	2	4	8	5	7	5	7	4	8	2	10
22	F	9	3	12	0	8	4	2	10	0	12	3	9
25	F	7	5	3	9	2	10	9	3	1	11	5	7
20	F	3	9	4	8	7	5	8	4	9	3	4	8
19	F	8	4	3	9	7	5	7	5	2	10	1	11
22	F	6	6	4	8	5	7	6	6	3	9	3	9
18	M	3	9	6	6	1	11	2	10	2	10	5	7
23	M	8	4	4	8	9	3	9	3	3	9	8	4
25	F	7	5	3	9	4	8	4	8	2	10	2	10
21	M	12	0	12	0	12	0	12	0	12	0	12	0
20	F	2	10	2	10	3	9	5	7	7	5	2	10
20	F	4	8	0	12	0	12	8	4	1	11	0	12
21	M	11	1	9	3	10	2	12	0	12	0	11	1
23	F	1	11	1	11	0	12	2	10	1	11	1	11
35	F	5	7	3	9	4	8	1	11	0	12	1	11
25	F	5	7	1	11	1	11	2	10	0	12	0	12
37	F	5	7	2	10	5	7	2	10	0	12	0	12
29	F	10	2	1	11	7	5	11	1	1	11	12	0
34	M	7	5	4	8	0	12	8	4	3	9	2	10
25	M	4	8	3	9	5	7	4	8	5	7	4	8
20	M	7	5	2	10	5	7	4	8	0	12	3	9
29	M	6	6	4	8	4	8	8	4	5	7	1	11
22	M	2	10	0	12	2	10	4	8	1	11	2	10
26	M	0	12	0	12	0	12	0	12	0	12	0	12
25	M	0	12	0	12	0	12	0	12	0	12	0	12
29	M	12	0	11	1	12	0	12	0	7	5	12	0
24	M	0	12	0	12	0	12	0	12	0	12	0	12
20	M	9	3	2	10	3	9	11	1	5	7	3	9
22	M	1	11	1	11	0	12	2	10	0	12	0	12
18	M	2	10	4	8	4	8	5	7	6	6	5	7
21	F	8	4	8	4	5	7	2	10	2	10	1	11
22	F	2	10	2	10	3	9	2	10	2	10	1	11
18	F	8	4	5	7	5	7	5	7	8	4	5	7
21	F	4	8	0	12	1	11	10	2	2	10	4	8
23	F	1	11	0	12	0	12	6	6	0	12	1	11
37	F	5	7	5	7	6	6	8	4	7	5	9	3
22	F	12	0	12	0	12	0	12	0	12	0	12	0
25	F	6	6	6	6	7	5	4	8	5	7	3	9
17	F	7	5	4	8	8	4	4	8	1	11	5	7
31	M	8	4	7	5	9	3	6	6	1	11	2	10
27	M	3	9	7	5	4	8	4	8	5	7	4	8
32	M	10	2	0	12	0	12	12	0	0	12	0	12
21	M	6	6	6	6	4	8	1	11	0	12	2	10
23	F	3	9	1	11	2	10	3	9	2	10	0	12
		879	849	582	1146	729	999	753	975	417	1311	463	1265

## Sheet: Experiment 3
Age	Gender	Extinction	C12_1NoCooYes	C12_2NoCooNo	C12_3NoCheYes	C12_4NoCheNo	C12_5NoNewYes	C12_6NoNewNo	C12_7ExCooYes	C12_8ExCooNo	C12_9ExCheYes	C12_10ExCheNo	C12_11ExNewYes	C12_12ExNewNo
21	M	1	0	0	0	0	0	0	7	5	10	2	10	2
21	F	1	0	0	0	0	0	0	3	9	6	6	7	5
20	F	1	0	0	0	0	0	0	6	6	8	4	8	4
39	M	1	0	0	0	0	0	0	7	5	7	5	4	8
29	M	1	0	0	0	0	0	0	6	6	7	5	6	6
29	F	1	0	0	0	0	0	0	7	5	1	11	0	12
21	F	1	0	0	0	0	0	0	5	7	7	5	6	6
24	F	1	0	0	0	0	0	0	7	5	4	8	5	7
23	M	1	0	0	0	0	0	0	7	5	6	6	7	5
21	F	1	0	0	0	0	0	0	6	6	5	7	6	6
38	M	1	0	0	0	0	0	0	8	4	8	4	9	3
30	M	1	0	0	0	0	0	0	11	1	10	2	12	0
21	F	1	0	0	0	0	0	0	8	4	6	6	7	5
21	F	1	0	0	0	0	0	0	8	4	4	8	6	6
21	F	1	0	0	0	0	0	0	9	3	8	4	8	4
34	F	1	0	0	0	0	0	0	12	0	2	10	5	7
23	F	0	7	5	2	10	8	4	0	0	0	0	0	0
21	F	0	11	1	6	6	7	5	0	0	0	0	0	0
25	M	0	9	3	0	12	0	12	0	0	0	0	0	0
20	M	0	0	12	0	12	0	12	0	0	0	0	0	0
21	M	0	9	3	4	8	7	5	0	0	0	0	0	0
30	M	0	9	3	3	9	2	10	0	0	0	0	0	0
32	F	0	6	6	2	10	5	7	0	0	0	0	0	0
20	F	0	6	6	5	7	1	11	0	0	0	0	0	0
22	M	0	12	0	12	0	12	0	0	0	0	0	0	0
22	M	0	0	12	2	10	0	12	0	0	0	0	0	0
21	F	0	7	5	4	8	6	6	0	0	0	0	0	0
24	M	0	12	0	12	0	12	0	0	0	0	0	0	0
20	M	0	8	4	5	7	10	2	0	0	0	0	0	0
24	F	0	5	7	2	10	8	4	0	0	0	0	0	0
21	F	0	11	1	4	8	11	1	0	0	0	0	0	0
22	F	0	11	1	0	12	4	8	0	0	0	0	0	0
22	F	0	7	5	1	11	6	6	0	0	0	0	0	0
			130	74	64	140	99	105	117	75	99	93	106	86
